# Supplementary material
Source: Springer Nature journal article supplement (https://www.springermedizin.de/resource/supplementary/12958_2011_937_MOESM2_ESM.PDF/9566404)
Supplement: MOESM2 [file 9566404]

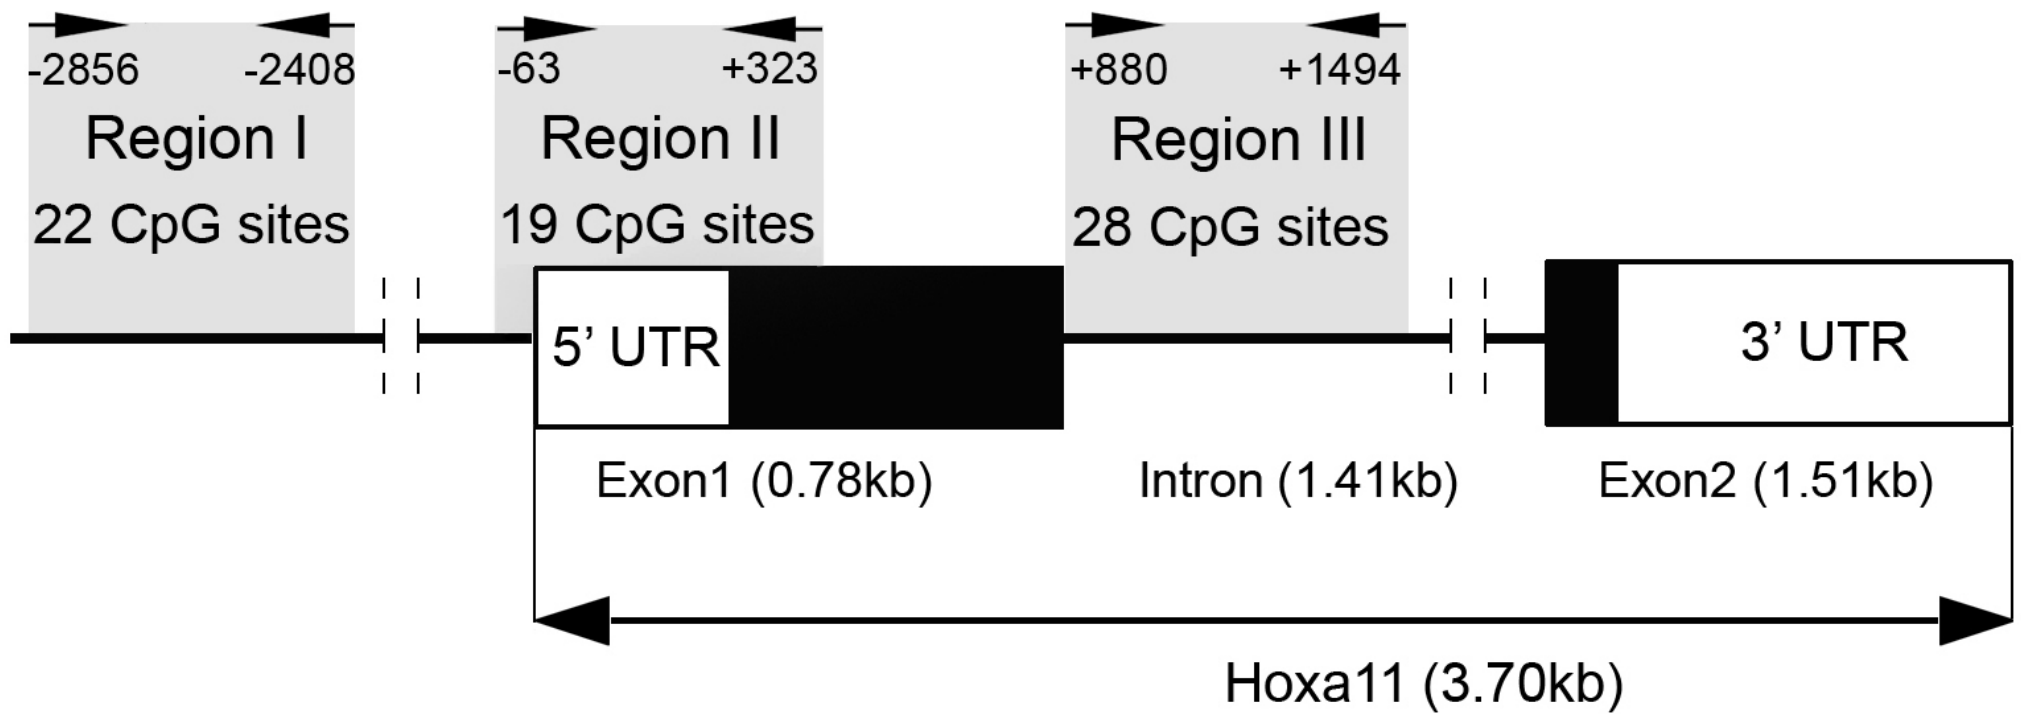

**Figure S1. Location of CpG-rich regions I, II, and III in the human *HOXA11* gene**

Three CpG-rich regions in the *HOXA11* gene were located: the first one (I, 22CpG) 2408 bp upstream of exon 1, the second (II, 19 CpG) mainly in the first exon, and the third (III, 28CpG) in the intron separating exons 1 and 2. The arrows correspond to the position of primers exploited for bisulfite sequencing of *HOXA11* regions I-II-III (Additional file 1, Table S1).
